# Supplementary material for: A high performance electrochemical deionization method to desalinate brackish water with an FePO4/RGO nanocomposite
Source: Royal Society of Chemistry journal article supplement (doi:10.1039/c8ta01361f), 2018-01-01
Supplement: c8ta01361f1.pdf [file c8ta01361f1.pdf]

## Supporting Information

### **FePO<sub>4</sub>/rGO composite anode for high performance electrochemical deionization of brackish water**

Lu Guo<sup>1</sup>, Yinxi Huang<sup>1</sup>, Meng Ding<sup>1</sup>, Zhi Yi Leong<sup>1</sup>, Sareh Vafakhah<sup>1</sup> and Yang Hui Ying\*<sup>1</sup>

<sup>1</sup> Pillar of Engineering Product Development, Singapore University of Technology and Design, 8 Somapah Road, 487372, Singapore.

\*Corresponding author. Tel.: +65 6303 6663; Fax: +65 6779 5161. E-mail address: yanghuiying@sutd.edu.sg (H. Y. Yang).

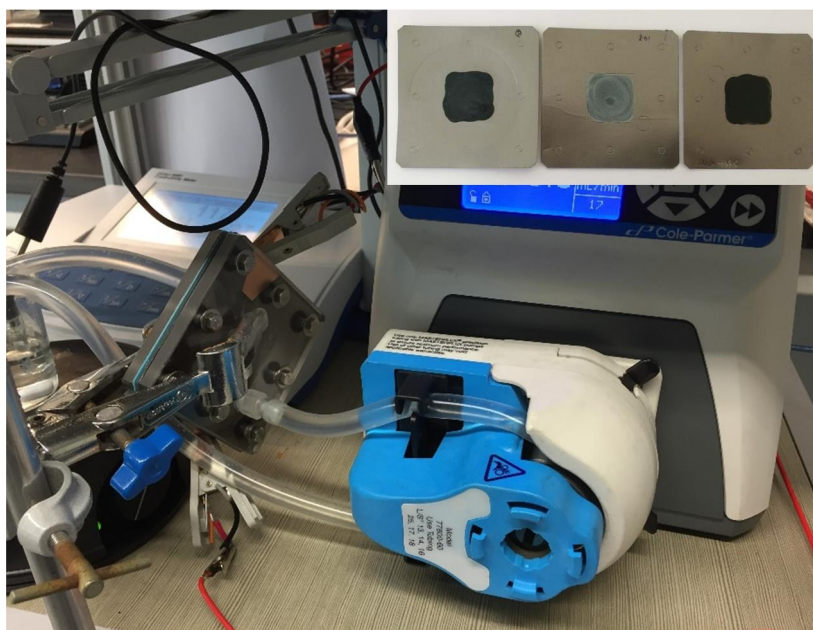

**Figure S1.** Photograph of the EDI set. Inserted are the AC, FePO<sub>4</sub> and FePO<sub>4</sub>@rGO electrodes respectively (from left to right).

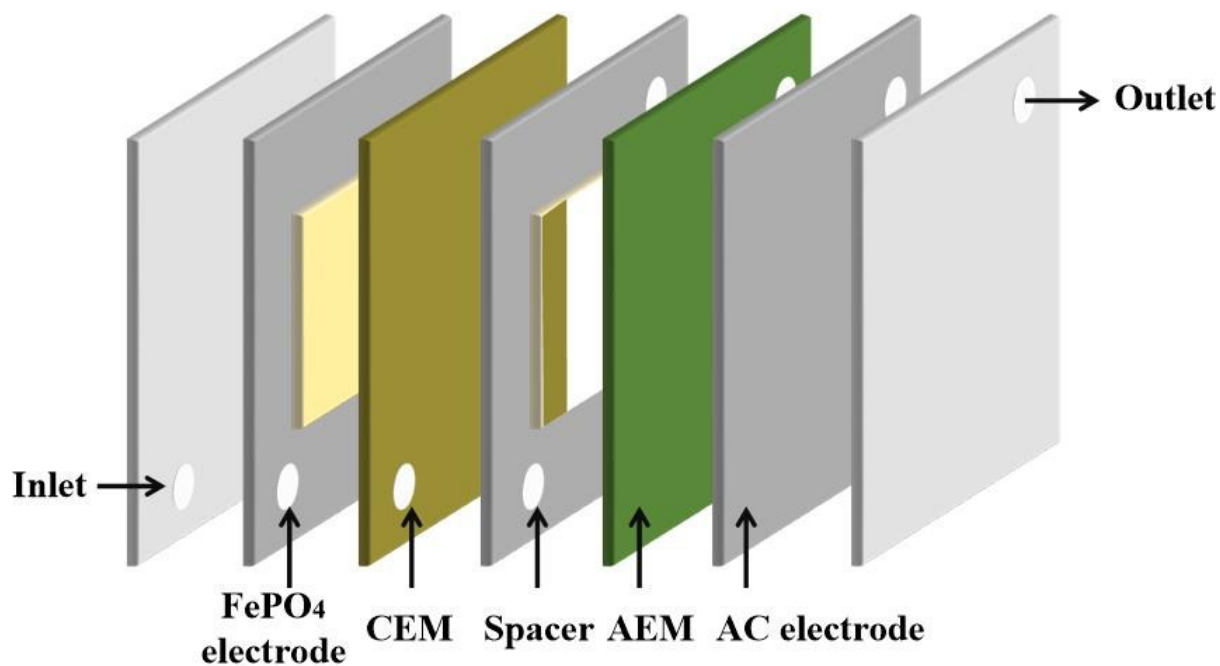

Figure S2. Schematic diagram of the EDI device.

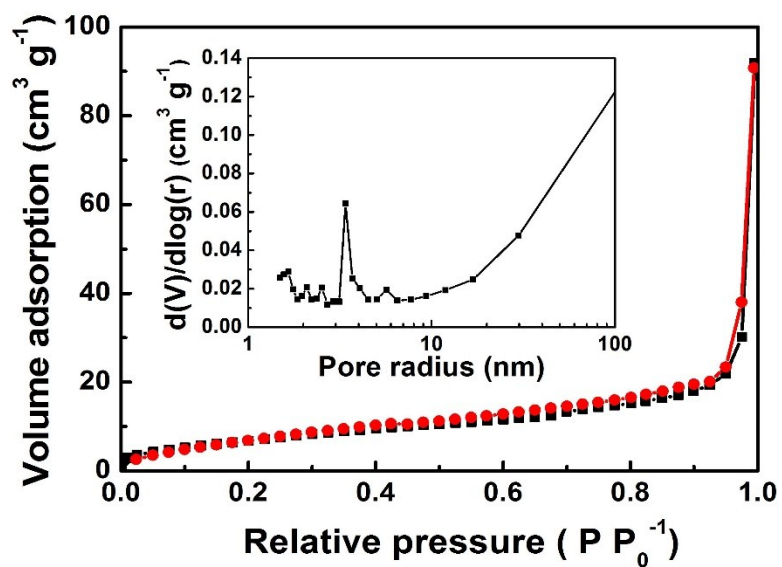

Figure S3. Nitrogen sorption isotherms of the amorphous FePO<sub>4</sub> nanoparticles, inserted is the pore size distribution.

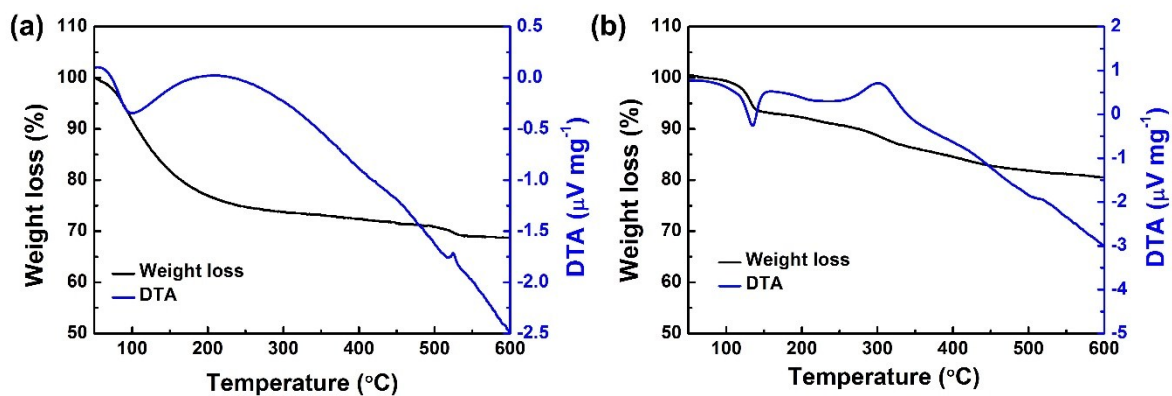

**Figure S4.** TGA and DTA profiles of  $\text{FePO}_4$  and  $\text{FePO}_4@\text{RGO}$  powders measured at a heating rate of  $5\text{ }^\circ\text{C min}^{-1}$  in air.

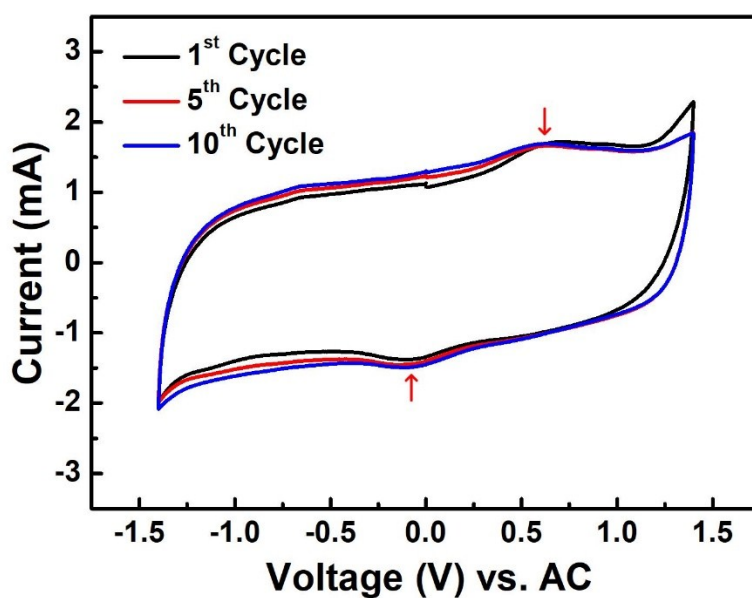

**Figure S5.** CV curve of the  $\text{FePO}_4$  electrode measured at a scan rate of  $10\text{ mV s}^{-1}$  coupled with an AC electrode under a flow-through system shown in fig S1.

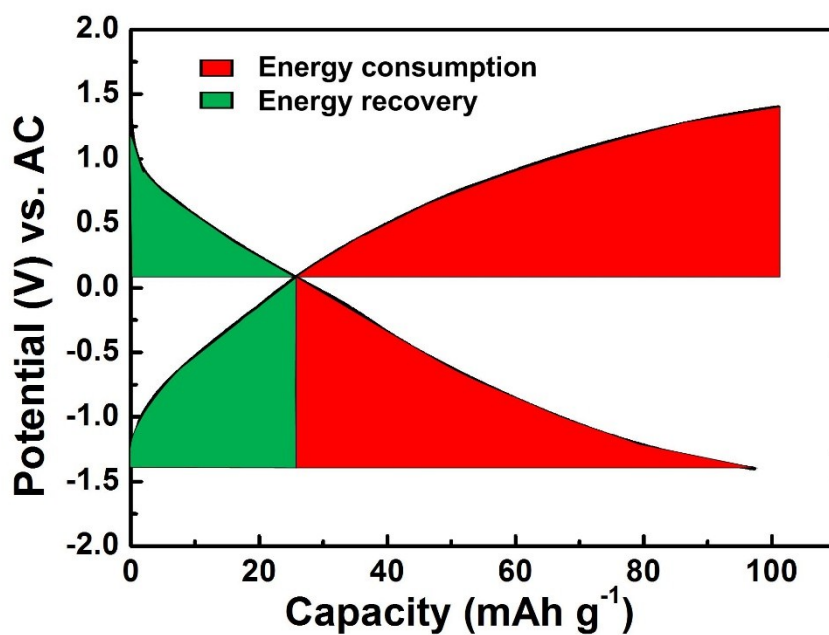

**Figure S6.** (d) A typical charging and discharging curve of EDI within a flow through system with a current density of  $100 \text{ mA g}^{-1}$ . The red and green colours represent the charging and discharging process respectively. The total energy consumed by the EDI should be calculated by the red area (energy consumption) minus the green area (energy recovery).

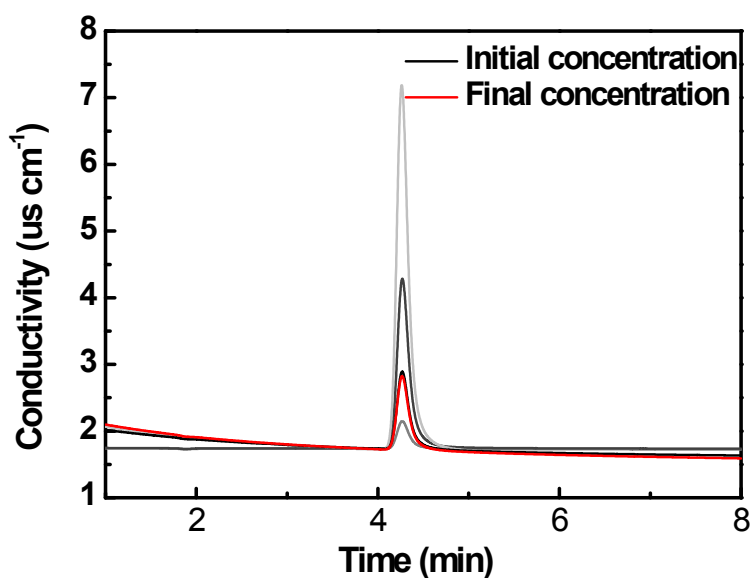

**Figure S7.** Conductivity detection and the retention time of IC for brackish water before and

after deionization.

**Table 1.** Comparison of the chloride ion concentration before and after experiment

| Sample type           | Index | Retention time | Concentration |
|-----------------------|-------|----------------|---------------|
| Initial concentration | 1     | 4.267          | 2405ppm       |
| Final concentration   | 1     | 4.267          | 2302ppm       |

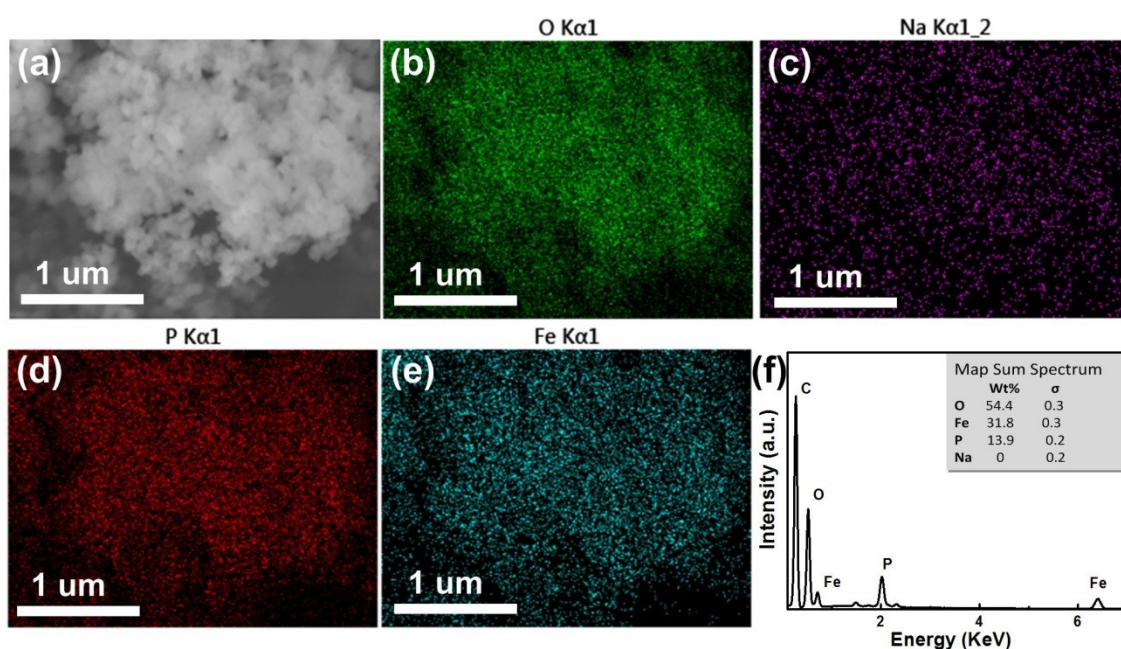

**Figure S8.** The FESEM image (a), the element mapping images of O, Na, P, Fe (c~e) and the EDS spectra (f) of the FePO<sub>4</sub> particles before sodium intercalation.

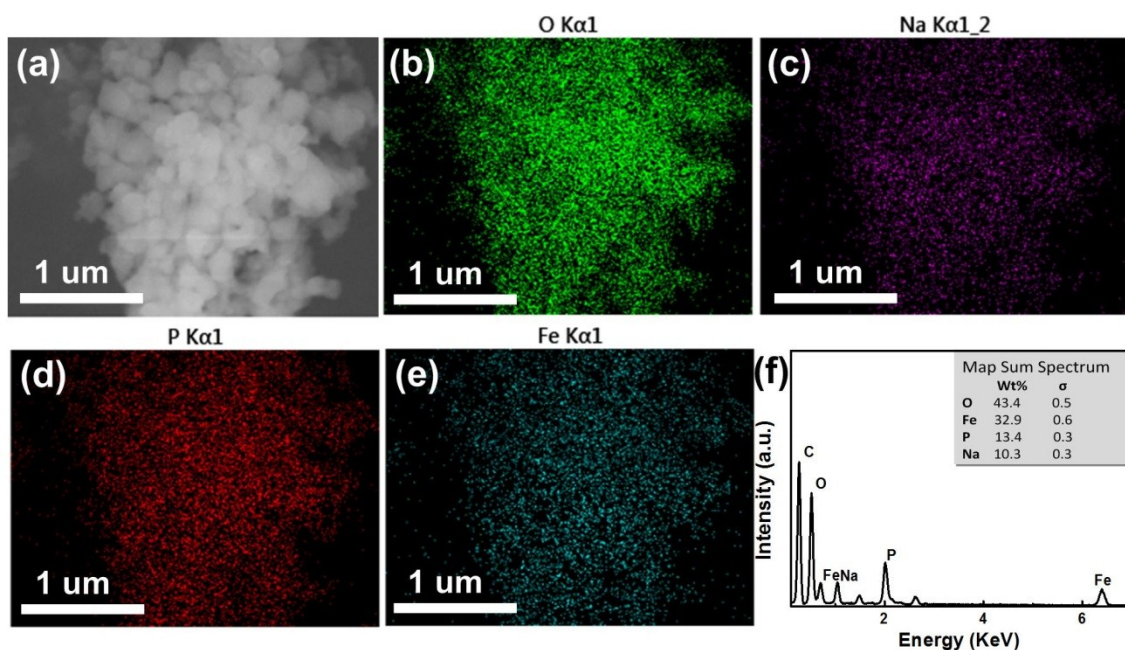

**Figure S9.** The FESEM image (a), the element mapping images of O, Na, P, Fe (c~e) and the EDS spectra (f) of the  $\text{FePO}_4$  particles after sodium intercalation.

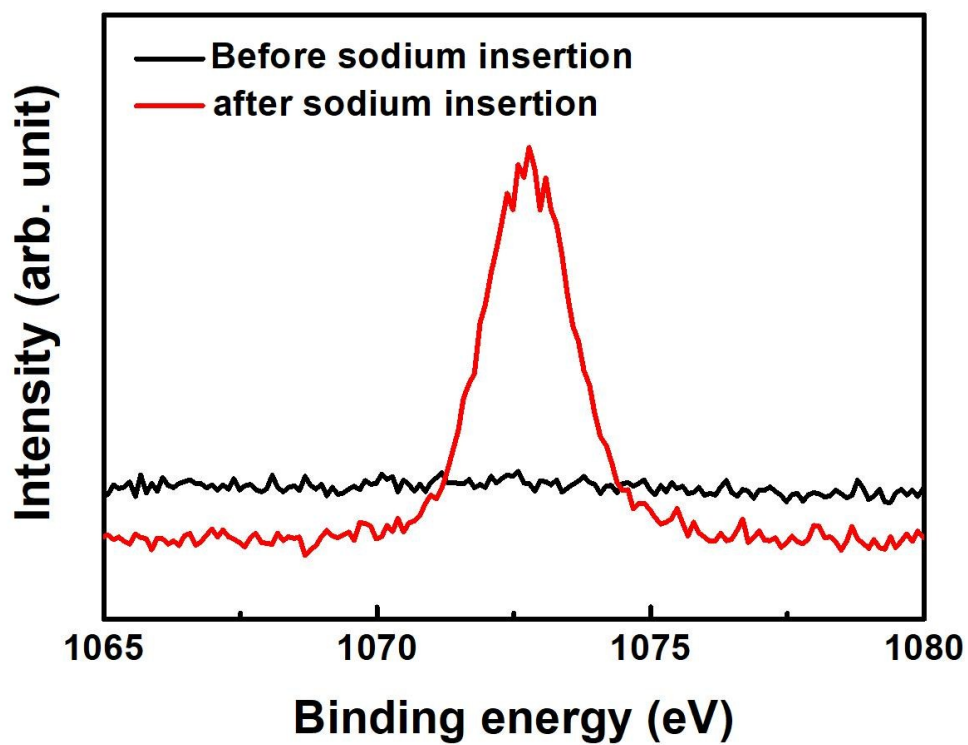

**Figure S10.** High resolution XPS Na 1s spectra of  $\text{FePO}_4$  electrode before and after sodium

insertion.
